# Supplementary material for: A Gd-doped polydopamine (PDA)-based theranostic nanoplatform as a strong MR/PA dual-modal imaging agent for PTT/PDT synergistic therapy
Source: Royal Society of Chemistry journal article supplement (doi:10.1039/d0tb02725a), 2021-01-01
Supplement: d0tb02725a1.pdf [file d0tb02725a1.pdf]

## Supporting Information

# Gd-doped Polydopamine (PDA)-based theranostic nanoplatform as strong MR/PA dual-modal imaging agent for PTT/PDT synergistic therapy

*Yiyao Pu<sup>1, 2</sup>, Yuda Zhu<sup>1, 2\*</sup>, Zi Qiao<sup>1, 2</sup>, Nini Xin<sup>1, 2</sup>, Suping Chen<sup>1, 2</sup>, Jing Sun<sup>1, 2</sup>,  
Rongrong Jin<sup>1, 2</sup>, Yu Nie<sup>1, 2</sup>, Hongsong Fan<sup>1, 2\*</sup>*

<sup>1</sup> National Engineering Research Centre for Biomaterials, Sichuan University, Chengdu 610064, P. R. China.

<sup>2</sup> College of Biomedical Engineering, Sichuan University, Chengdu 610064, Sichuan, China.

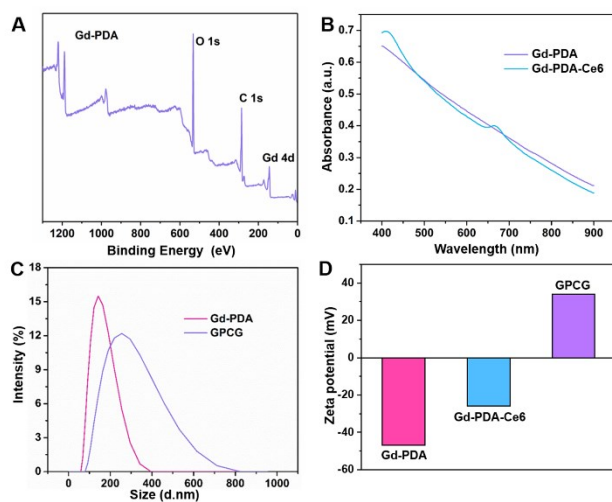

**Fig. S1** (A) XPS spectra of Gd-PDA NPs, (B) UV-vis spectrum of Gd-PDA and Gd-PDA-Ce6 NPs, (C) Hydrodynamic size distribution of Gd-PDA and GPCG NPs, (D) Zeta potential of Gd-PDA, Gd-PDA-Ce6 and GPCG NPs.

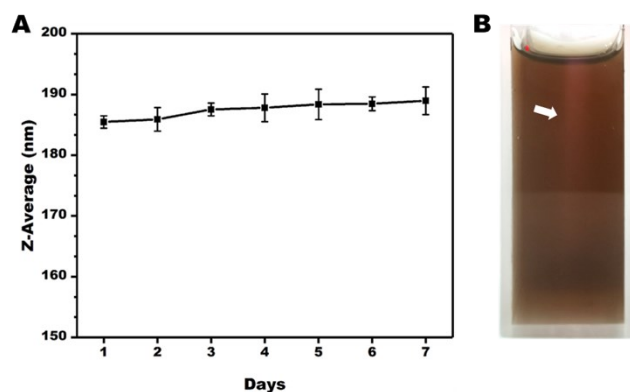

**Fig. S2** Colloidal stability of GPCG NPs: (A) the 7-day stability test on the size of GPCG NPs. (B) Tyndall effect of GPCG aqueous solution at the 7<sup>th</sup> day.

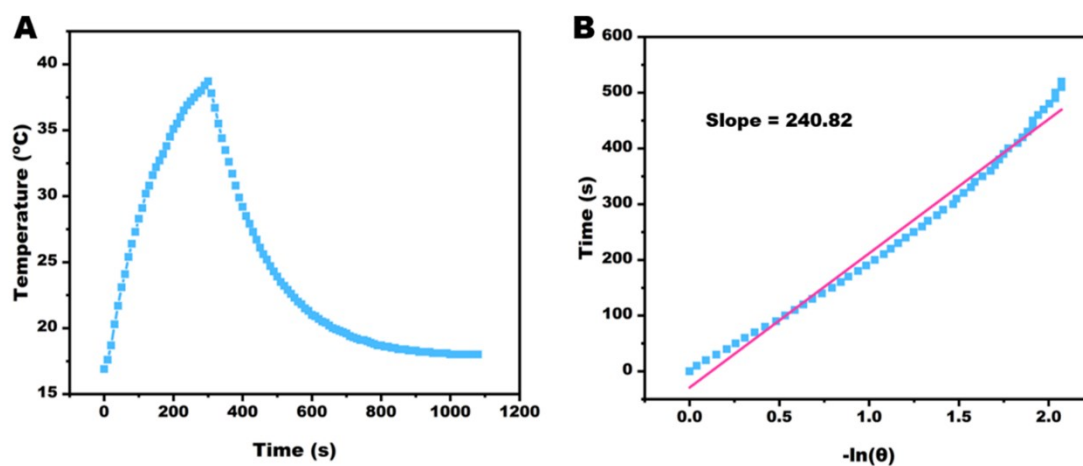

**Fig. S3** (A) Photothermal property of 1 mg/mL GPCG NPs aqueous dispersion when irradiated with 808 nm laser ( $2 \text{ W/cm}^2$ ). The laser was turned off after irradiation for 5 min. (B) Plot of cooling time versus negative natural logarithm of the temperature driving force obtained from the cooling stage as shown in (A). The time constant for heat transfer of the system is determined to be  $\tau_s = 240.82$ .

| Agents                                              | Wavelength (nm) | PCE (%) | Reference                                                                       |
|-----------------------------------------------------|-----------------|---------|---------------------------------------------------------------------------------|
| Dopamine-Melanin Colloidal Nanospheres <sup>4</sup> | 808             | 40      | <i>Advanced Materials</i> , 2013, <b>25</b> , 1353-1359.                        |
| Polydopamine Carbon Dots <sup>5</sup>               | 808             | 35      | <i>Nanoscale Research Letters</i> , 2018, <b>13</b> , 287.                      |
| MOF-Polydopamine Hybrid Nanogels <sup>6</sup>       | 808             | 41.3    | <i>Advanced Science</i> , 2018, <b>5</b> , 1800287.                             |
| Polypyrrole@polydopamine <sup>7</sup>               | 808             | 38.8    | <i>Journal of Materials Chemistry B</i> , 2017, <b>5</b> , 1108-1116.           |
| Polydopamine nanocapsule <sup>8</sup>               | 808             | 40.43   | <i>ACS Biomaterials Science &amp; Engineering</i> , 2017, <b>3</b> , 1799-1808. |

**Tab. 1** Photothermal conversion efficiency of typical reported PDA-related PTT agents.

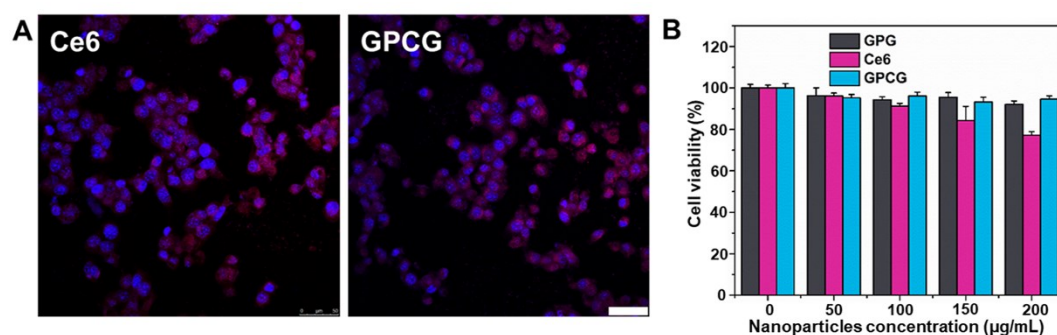

**Fig. S4** (A) Cellular uptake of Ce6 and GPCG NPs under the same culture conditions by CLSM, (B) The cytotoxicity of GPG, Ce6 and GPCG NPs without irradiation by MTT assay. (The corresponding concentration of Ce6 is 0, 3.75, 7.5, 11.25 and 15 µg/mL, respectively.) Scar bar: 50 µm.

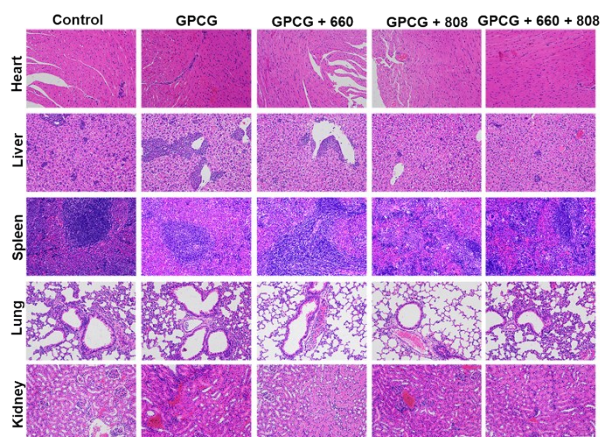

**Fig. S5** In vivo toxicology evaluation of GPCG NPs via H&E staining of major organs. Scar bar: 100  $\mu$ m.

1. W. Ren, Y. Yan, L. Zeng, Z. Shi, A. Gong, P. Schaaf, D. Wang, J. Zhao, B. Zou, H. Yu, G. Chen, E. M. B. Brown and A. Wu, *Advanced Healthcare Materials*, 2015, **4**, 1526-1536.
2. L. Zeng, H. Zhao, Y. Zhu, S. Chen, Y. Zhang, D. Wei, J. Sun and H. Fan, *Journal of Materials Chemistry B*, 2020, **8**, 4093-4105.
3. Q. Tian, F. Jiang, R. Zou, Q. Liu, Z. Chen, M. Zhu, S. Yang, J. Wang, J. Wang and J. Hu, *ACS Nano*, 2011, **5**, 9761-9771.
4. Y. Liu, K. Ai, J. Liu, M. Deng, Y. He and L. Lu, *Advanced Materials*, 2013, **25**, 1353-1359.
5. Y. Bai, B. Zhang, L. Chen, Z. Lin, X. Zhang, D. Ge, W. Shi and Y. Sun, *Nanoscale Research Letters*, 2018, **13**, 287.
6. D. Wang, H. Wu, J. Zhou, P. Xu, C. Wang, R. Shi, H. Wang, H. Wang, Z. Guo and Q. Chen, *Advanced Science*, 2018, **5**, 1800287.
7. Z. Yang, J. Ren, Z. Ye, W. Zhu, L. Xiao, L. Zhang, Q. He, Z. Xu and H. Xu, *Journal of Materials Chemistry B*, 2017, **5**, 1108-1116.
8. H. Zhuang, H. Su, X. Bi, Y. Bai, L. Chen, D. Ge, W. Shi and Y. Sun, *ACS Biomaterials Science & Engineering*, 2017, **3**, 1799-1808.
